# Supplementary material for: Clinical Trial Ethical Challenges in Low- and Middle-Income Countries: A Review of Systematic Review
Source: Research Square preprint supplement (doi:10.21203/rs.3.rs-8292062/v1), 2025-12-12
Supplement: Supplementary file 1 [file 74d98a08243f451b8bca5c29.docx]

**Supplementary files**

**Table S1. Free-text search term used for this study**

| #1 | #2 | #3 | #4 |
| --- | --- | --- | --- |
| ethic* consideration* OR ethic* issue* OR ethic* concern* | clinical trial* OR clinical stud* OR clinical research* OR clinical intervention* | low-and-middle income countr* OR LMIC* | systematic review* OR review, systematic |

**Table S2. Excluded publications and reason for exclusion (after independent panel review)**

| Author | Title | Reason for exclusion |
| --- | --- | --- |
| Davidson et al.1 | Access to preventive sexual and reproductive health care for women from refugee-like backgrounds: a systematic review | This review does not focus on ethical concern in clinical trials, but on the access toward healthcare system among LMICs. |
| MacDonald et al.2 | Ethical Aspects of Involving Children and Adolescents In HIV Research: A Systematic Review of The Empiric Literature | Although it discusses the ethical aspect of children’s involvement in clinical trials, but it is a poster presentation. It also does not explicitly discuss on which LMICs were included. |
| Cook et al.3 | Patient and public involvement in health research in low and middle-income countries: a systematic review | This review narrates on the community engagement in health research (such as community-based participatory research) and how patient and public involvement could impact clinical trials. |
| Alsulami et al.4 | Medication errors in the Middle East countries: a systematic review of the literature | The review mainly discusses medication error, transcribing error, and prescribing error; as well as identifying the contributing factors of medication error. |
| Milner et al.5 | Mechanisms of brief contact interventions in clinical populations: a systematic review | The review is not ethics-related and discusses on the follow-up care of patients in preventing suicide and self-harm. |
| Day et al.6 | Stakeholder engagement to inform HIV clinical trials: a systematic review of the evidence | This review does not focus on ethics consideration in HIV clinical trials, but on stakeholder’s role and engagement strategy in each clinical trial stage. |
| Johnson et al.7 | Risks of phase I research with healthy participants: a systematic review | This paper does not talk about ethical issues in clinical trial phase 1. It focuses on reported probability of AE and SAE, the risk of AE toward phase 1 participants. |
| Lawrence et al.8 | Equity in clinical trials for HIV-associated cryptococcal meningitis: A systematic review of global representation and inclusion of patients and researchers | This review does not focus on ethical concern but discusses characteristics of patient recruited (equity in gender participation). It also discusses on equity about authorship and author’s origin. |
| Browne et al.9 | The willingness to participate in biomedical research involving human beings in low‐and middle‐income countries: a systematic review | This review does include LMICs, but it discusses on the reason and people’s willingness of participation into clinical trials. |
| Soll et al.10 | Improving assent in health research: a rapid systematic review | Brazil is no longer classified as LMIC by the World Bank. This review focuses on improving comprehension of child assent and suggesting on practical strategy as well. |

**Table S3: Quality assessment of the included articles using AMSTAR 2**

| AMSTAR 2/ Article | Beeler et al.11 | Raciti et al.12 | De Pretto-Lazarova et al.13 | Patterson et al.14 | Tam et al.15 | Cohen et al.16 | Fitzpatrick et al.17 | Paramasivan et al.18 |
| --- | --- | --- | --- | --- | --- | --- | --- | --- |
| PICO components | Yes | Yes | Yes | Yes | Yes | Yes | Yes | Yes |
| Reporting methods and justification of deviations | No | Partial yes | No | No | Partial yes | No | Partial yes | Yes |
| Inclusion criteria | Yes | Yes | Yes | Yes | Yes | Yes | Yes | Yes |
| Search strategy | Partial yes | Partial yes | Partial yes | Partial yes | Partial yes | Partial yes | Yes | Partial yes |
| Duplicate review of study selection | No | Yes | Yes | Yes | Yes | No | No | Yes |
| Duplicate data extraction | No | Yes | Yes | No | No | Yes | Yes | Yes |
| Exclusion and justification of studies | Partial yes | Yes | Partial yes | No | Partial yes | No | Partial yes | Partial yes |
| Describing included studies | Partial yes | Partial yes | Partial yes | Partial yes | Yes | Partial yes | Partial yes | Partial yes |
| Assessing risk of bias (RoB) | No for RCTs, Partial yes for NRSI | Partial yes for both RCTs and NRSI | No, includes only NRSI | No, includes only RCTs | Yes for RCTs, Partial yes for NRSI | No, includes only RCTs | Yes for RCTs,  No for NRSI | Partial yes for RCTs, No for NRSI |
| Source of funding | No | Yes | No | Yes | No | Yes | Yes | Yes |
| Justification of meta-analysis (if performed) | No meta-analysis conducted for both RCTs and NRSI | No meta-analysis conducted for both RCTs and NRSI | No meta-analysis conducted for both RCTs and NRSI | Yes for RCTs,  No meta-analysis conducted for NRSI | Yes for RCTs, No meta-analysis conducted for NRSI | No for RCTs, No meta-analysis conducted for NRSI | No meta-analysis conducted for both RCTs and NRSI | No meta-analysis conducted for both RCTs and NRSI |
| Impact of RoB on meta-analysis (if performed) | No meta-analysis conducted | No meta-analysis conducted | No meta-analysis conducted | No meta-analysis conducted | No | No | No meta-analysis conducted | No meta-analysis conducted |
| Author’s RoB on discussion | Yes | Yes | No |  | No | No | Yes | Yes |
| Discussion of heterogeneity observed | No | Yes | Yes |  | Yes | No | No | No |
| Potential publication bias | No meta-analysis conducted | No meta-analysis conducted | No meta-analysis conducted |  | Yes | No | No meta-analysis conducted | No meta-analysis conducted |
| Potential conflict of interest (COI)/ funding | Yes | Yes | Yes |  | Yes | No | Yes | Yes |

PICO: population, intervention, control, and outcomes; RCTs: randomized controlled clinical trials; NRSI: non-randomized studies of intervention

**References**

1. Davidson N, Hammarberg K, Romero L, et al. Access to preventive sexual and reproductive health care for women from refugee-like backgrounds: a systematic review. *BMC Public Health* 2022; 22(1): 403.
2. MacDonald KR, Ott M, McHenry M, et a. 193. Ethical Aspects of Involving Children and Adolescents In HIV Research: A Systematic Review of The Empiric Literature. *J Adolesc Health* 2019; 64(2): S98-S99.
3. Cook N, Siddiqi N, Twiddy M, et al. Patient and public involvement in health research in low and middle-income countries: a systematic review. *BMJ Open* 2019; 9(5): e026514.
4. Alsulami Z, Conroy S and Choonara I. Medication errors in the Middle East countries: a systematic review of the literature. *Eur J Clin Pharmacol* 2013; 69(4): 995–1008.
5. Milner A, Spittal MJ, Kapur N, et al. Mechanisms of brief contact interventions in clinical populations: a systematic review. *BMC Psychiatry* 2016; 16:194.
6. Day S, Blumberg M, Vu T, et al. Stakeholder engagement to inform HIV clinical trials: a systematic review of the evidence. *J Int AIDS Soc* 2018; 21 Suppl 7(Suppl 7), e25174.
7. Johnson RA, Rid A, Emanuel E, et al. Risks of phase I research with healthy participants: A systematic review. *Clin Trials* 2016; 13(2): 149–160.
8. Lawrence DS, Leeme T, Mosepele M, et al. Equity in clinical trials for HIV-associated cryptococcal meningitis: A systematic review of global representation and inclusion of patients and researchers. *PLoS Negl Trop Dis* 2021; 15(5): e0009376.
9. Browne JL, Rees CO, van Delden JJM, et al. The willingness to participate in biomedical research involving human beings in low- and middle-income countries: a systematic review. *Trop Med Int Health* 2019; 24(3): 264–279.
10. Soll D, Guraiib MM, Rollins NC, et al. Improving assent in health research: a rapid systematic review. *BMC Med Res Methodol* 2020; 20(1): 114
11. Beeler JA, Lambach P, Fulton TR, et al. A systematic review of ethical issues in vaccine studies involving pregnant women. *Hum Vaccines Immunother* 2016; 12(8): 1952–1959.
12. Raciti CG, Enane LA, MacDonald KR, et al. Ethical considerations for research involving pregnant women living with HIV and their young children: a systematic review of the empiric literature and discussion. *BMC Med Ethics* 2021; 22(1): 1-18.
13. De Pretto-Lazarova A, Brancati-Badarau DO and Burri C. Informed consent approaches for clinical trial participation of infants with minor parents in sub-Saharan Africa: A systematic review. *PloS One* 2020; 15(8): e0237088.
14. Patterson JK, Pant S, Jones DF, et al. Informed consent rates for neonatal randomized controlled trials in low-and lower middle-income versus high-income countries: a systematic review. *PloS One* 2021; 16(3): e0248263.
15. Tam NT, Huy NT, Thoa LTB, et al. Participants’ understanding of informed consent in clinical trials over three decades: systematic review and meta-analysis. *Bull World Health Organ* 2015; 93:186-198H.
16. Cohen ER, O'neill JM, Joffres M, et al. Reporting of informed consent, standard of care and post‐trial obligations in global randomized intervention trials: a systematic survey of registered trials. *Dev World Bioeth* 2009; 9(2): 74-80.
17. Fitzpatrick EF, Martiniuk AL, D’Antoine H, et al. Seeking consent for research with indigenous communities: a systematic review. *BMC Med Ethics* 2016; 17(1): 1-18.
18. Paramasivan S, Davies P, Richards A, et al. What empirical research has been undertaken on the ethics of clinical research in India? A systematic scoping review and narrative synthesis. *BMJ Glob Health* 2021; 6(5): e004729.
